# Supplementary material for: Sustainable Hunting Strategy of Sika Deer (Cervus nippon) in the Neolithic Lower Yangtze River Region, China
Source: Frontiers journal article supplement (doi:10.3389/feart.2021.812910), 2022-01-20
Supplement: Table_2.XLSX [file Table_2.XLSX]

## Sheet: Sheet1
No.	Dental age	PL	a
T301⑥:46	0.5	44.7	17.79
T204-5:14	0.5	23.7	10.5
T203-6:112	1	41.89	15.63
T304-5:70	1.5	42.18	16.27
T004⑥b:82	<2	41.07	16.68
T302⑤:412	<0.5	42.85	10.46
T104③:6	0.5	44.16	14.76
1004	2.5	39.3	18.16
1683-30	3.5	42.4	23.12
T105③:G28	4.5	41.02	21.39
T004-6b:5	4.5	40.47	17.5
T004-6b:4	4.5	37.69	19.8
T203-5:181	2.5	36.89	18.04
T003⑥:G15	3.5	37.68	19.22
T302⑤:413	3.5	40.25	18.31
T103③:G78	3.5	40.25	18.62
T303⑦:G4	3.5	36.64	17.55
T301⑦:216	2.5	40.16	18.93
T304⑥:19	2.5	36.91	17.27
1006-90	8.5+	37.12	19.78
1008-13	6.5	37.2	21.38
1693-600	6.5+	40.43	18.21
T301-5-189	5.5	58.34	18.36
T104-6-324	6.5+	35.88	20.13
T103-6:124	8.5	36.05	21.05
T203-6:111	8.5+	35.57	19.93
T205-5:11	8.5+	36.81	20.17
T204-5:130	8.5+	37.77	19.98
T205⑤:130	8.5+	36.6	20.38
T106③:49	6.5	37.52	22.84
T005⑦:19	5.5	37.93	18.09
T103⑥:129	7.5	37.42	18.61
1031-31		38.72	18.38
1030-30		39.6	22.58
T105③:G30		39.13	22.47
T105③:G31		38.28	18.7
T004-6:11		38.96	20.22
T204-4:8		37.95	21.4
T103-7:149		37.15	20.49
T302-5:282		41.08	13.69
T203⑥:G108		36.59	21.48
T003⑥:G18		38.91	20.5
T306⑥:5		39.05	17.71
T203⑤:180		36.01	20.28
T205⑤:12		41.08	20.63
T301⑤:G10		36.14	18.1
T302⑤:G143		39.22	20.08
T302⑤:411		36.89	19.65
T302⑤:152		38.74	20.06
T304⑤:G104		36.85	20.27
T304④:64		39.5	18.51
T103③:264		37.26	22.26
T104③:61		34.31	19.64
T104⑦:59		37.4	20.39
T303⑦:G5		38.52	22.8
T303⑦:G5		38.52	22.8
T004⑥:11		38.96	20.22
T104⑥:326		34.36	22.74
T104⑥:355		37.03	14.03
T304⑥:14		45.49	15.31
